# Supplementary material for: Solid solution phosphide (Mn1−xFexP) as a tunable conversion/alloying hybrid anode for lithium-ion batteries
Source: Royal Society of Chemistry journal article supplement (doi:10.1039/c9nr02016k), 2019-01-01
Supplement: c9nr02016k1.pdf [file c9nr02016k1.pdf]

Electronic Supplementary Information (ESI)

**Solid solution phosphide ( $\text{Mn}_{1-x}\text{Fe}_x\text{P}$ ) as a tunable conversion/alloying  
hybrid anode for lithium-ion batteries**

*Kyeong-Ho Kim, Won-Sik Kim and Seong-Hyeon Hong\**

Department of Materials Science and Engineering and Research Institute of Advanced  
Materials, Seoul National University, Seoul 151-744, Republic of Korea

\* Corresponding author

Prof. Seong-Hyeon Hong (S.-H. Hong)

E-mail: shhong@snu.ac.kr

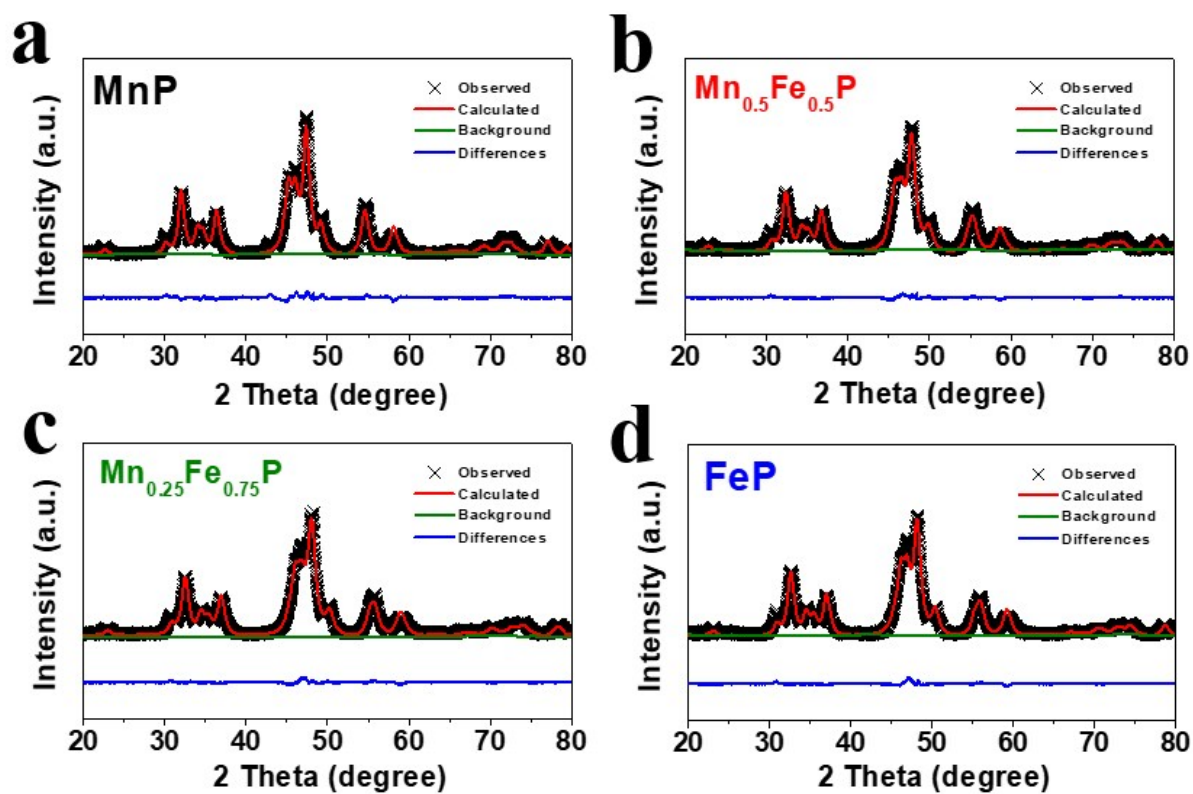

**Fig. S1** XRD Rietveld refinement results for as-synthesized  $\text{Mn}_{1-x}\text{Fe}_x\text{P}$  (x = 0, 0.5, 0.75, and 1.0) NPs.

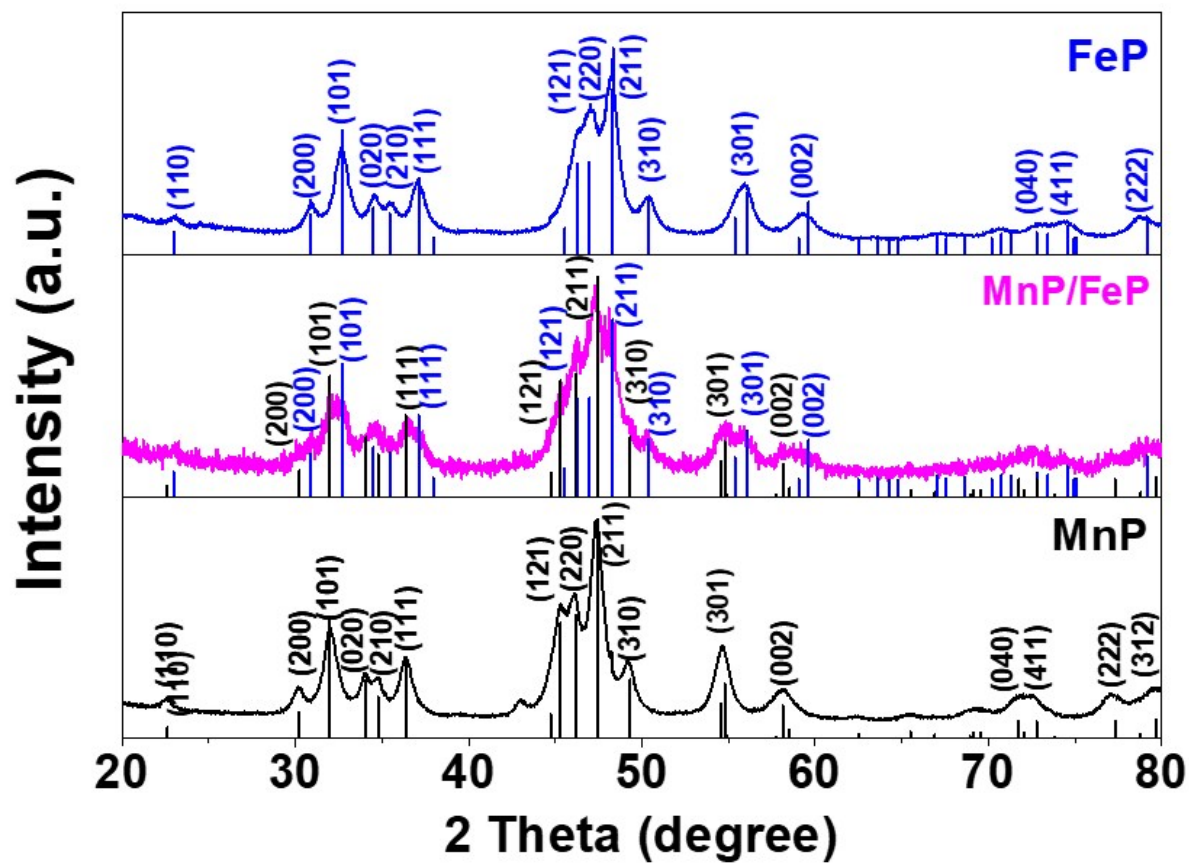

**Fig. S2** XRD patterns of as-synthesized MnP, MnP/FeP mixture, and FeP NPs. The reference peaks for MnP (ICDD # 00-051-0942, black color) and FeP (ICDD # 01-078-1443, blue color) are included.

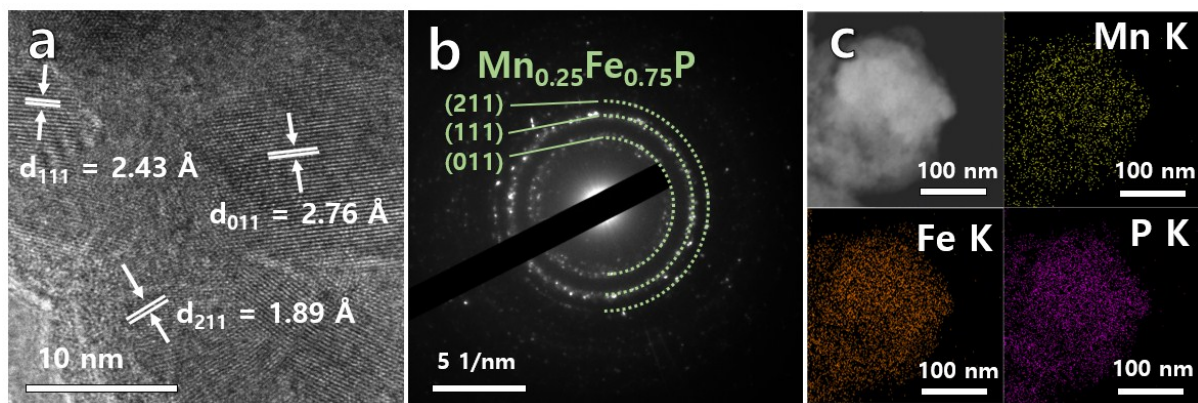

**Fig. S3** (a) HRTEM image, (b) SAED pattern, and (c) STEM and EDS element mapping images (Mn K, Fe K, and P K) of as-prepared  $\text{Mn}_{1-x}\text{Fe}_x\text{P}$  ( $x = 0.75$ ) NPs.

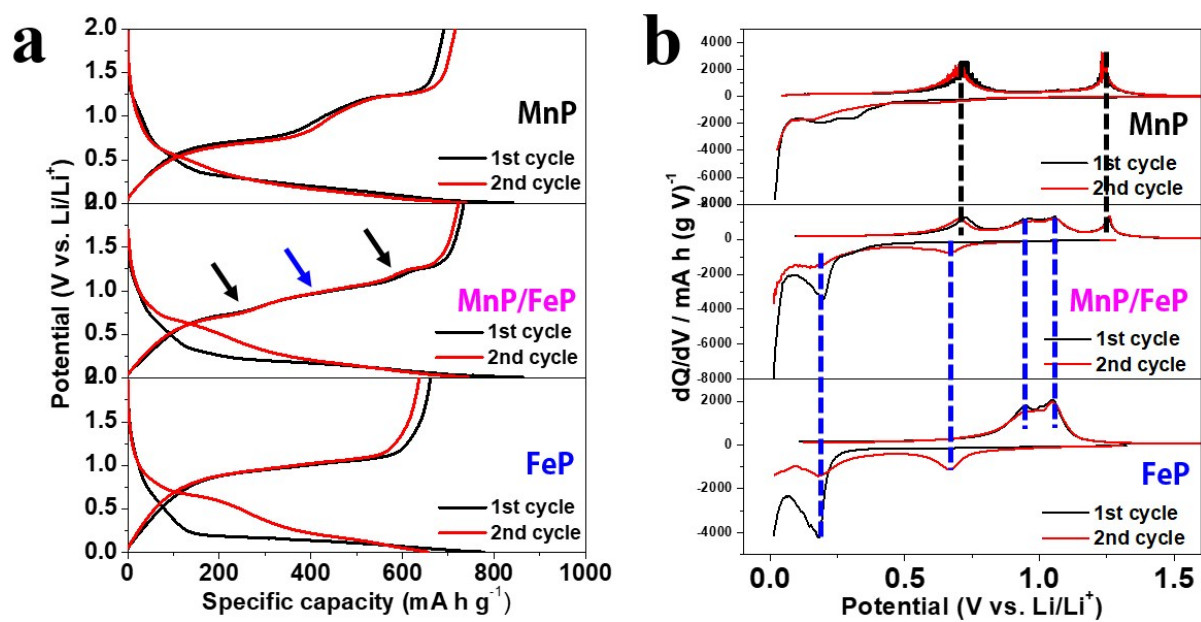

**Fig. S4** (a) Galvanostatic discharge/charge profiles and (b) corresponding differential capacity plots (DCPs) of MnP, MnP/FeP mixture, and FeP electrodes.

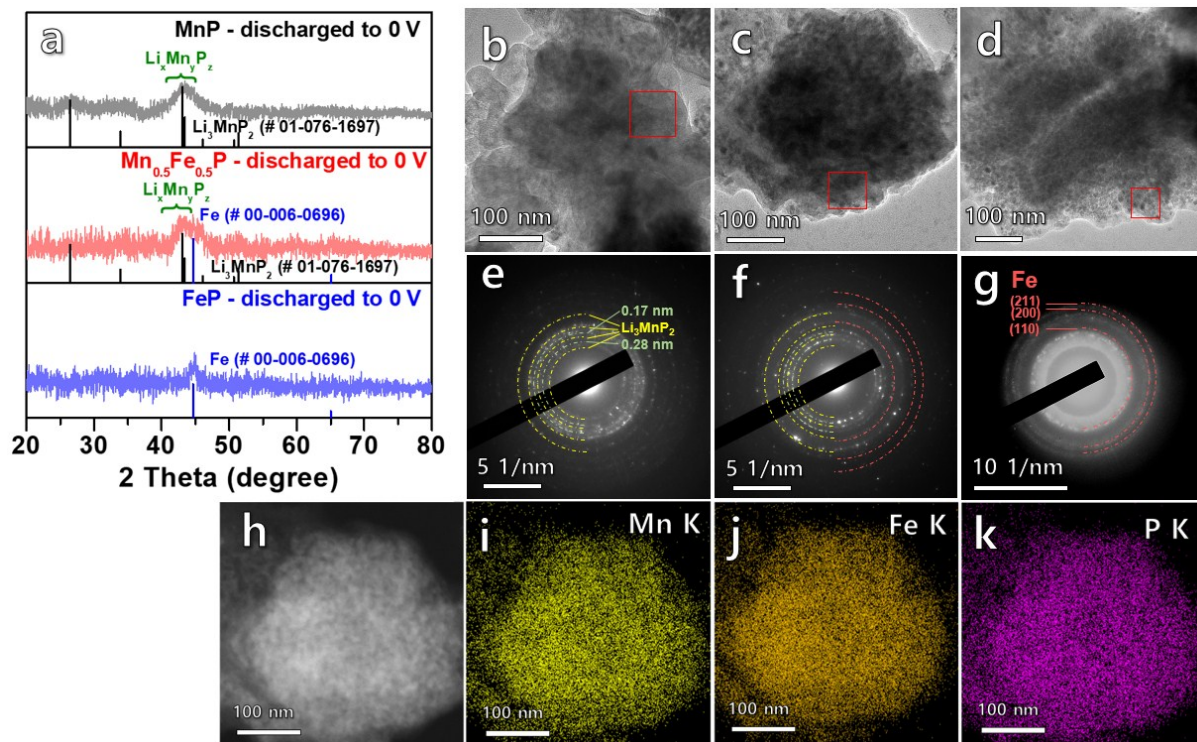

**Fig. S5** (a) *Ex-situ* XRD patterns, TEM images, and SAED patterns of fully discharged states of (b,e) MnP, (c,f)  $\text{Mn}_{0.5}\text{Fe}_{0.5}\text{P}$ , and (d,g) FeP electrodes, and (h) STEM image and (i-k) EDS mapping (Mn K, Fe K, and P K) of (c)  $\text{Mn}_{0.5}\text{Fe}_{0.5}\text{P}$  electrode.

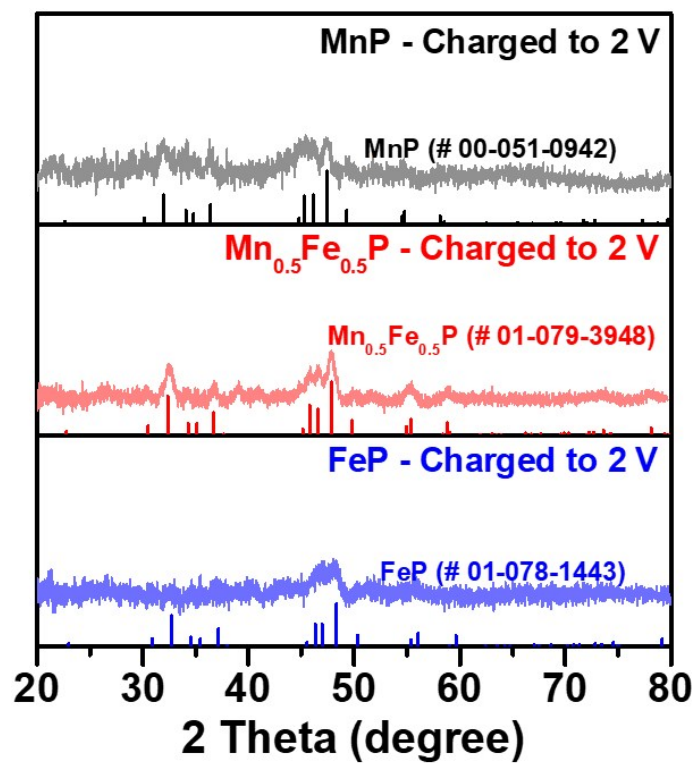

**Fig. S6** *Ex-situ* XRD patterns of 1<sup>st</sup> fully charged states for Mn<sub>1-x</sub>Fe<sub>x</sub>P (x = 0, 0.5, and 1.0) electrodes. The reference peaks for MnP (ICDD # 00-051-0942, black color), Mn<sub>0.5</sub>Fe<sub>0.5</sub>P (ICDD # 01-079-3948, red color), and FeP (ICDD # 01-078-1443, blue color) are included.

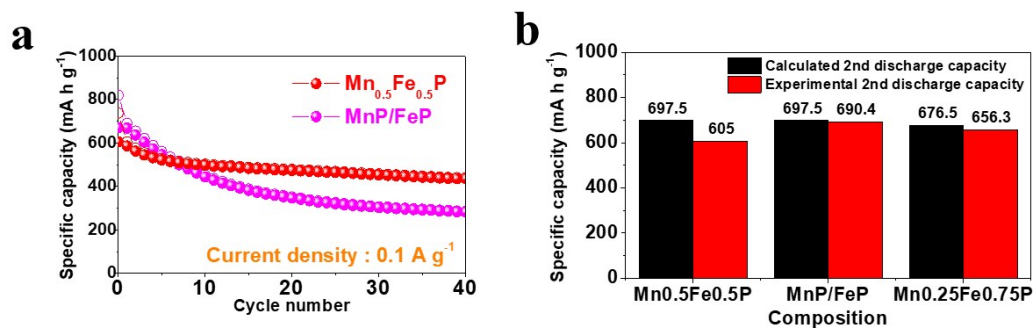

**Fig. S7** (a) Cycle performance of Mn<sub>0.5</sub>Fe<sub>0.5</sub>P solid solution and MnP/FeP mixture electrodes at the current density of 100 mA g<sup>-1</sup> and (b) comparison of experimentally determined and expected 2<sup>nd</sup> discharge capacity in Mn<sub>0.5</sub>Fe<sub>0.5</sub>P and Mn<sub>0.25</sub>Fe<sub>0.75</sub>P solid solution and MnP/FeP mixture electrodes. The expected values were estimated from the reversible capacities of both MnP and FeP electrodes.

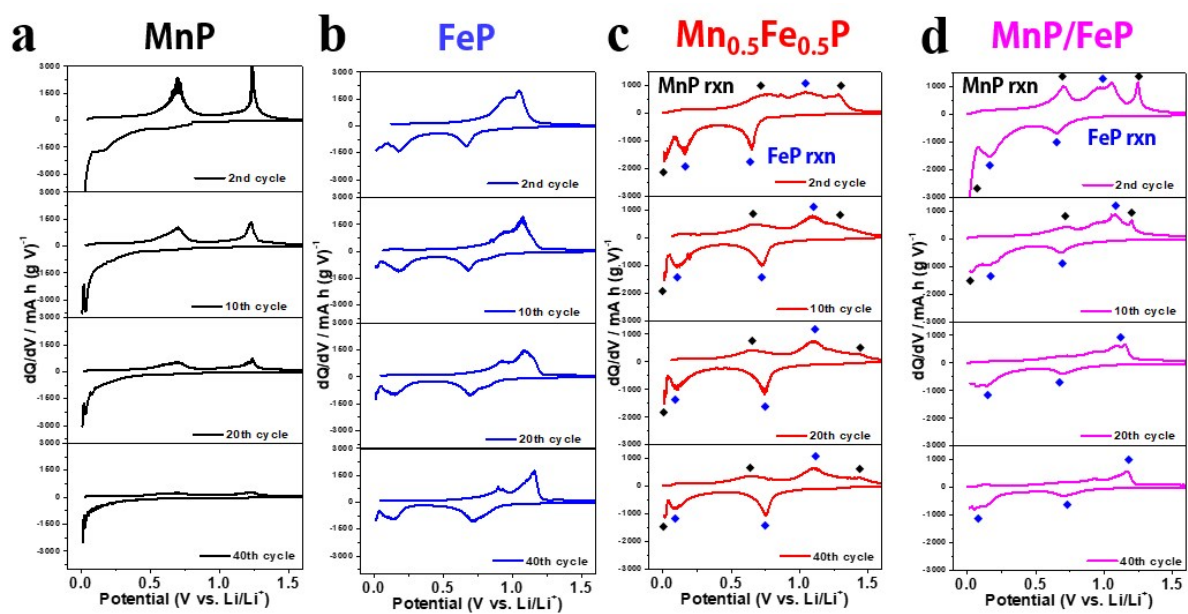

**Fig. S8** DCPs for MnP, FeP,  $\text{Mn}_{0.5}\text{Fe}_{0.5}\text{P}$ , and MnP/FeP electrodes for 2<sup>nd</sup>, 10<sup>th</sup>, 20<sup>th</sup>, and 40<sup>th</sup> cycles at the current density of 100 mA g<sup>-1</sup>.

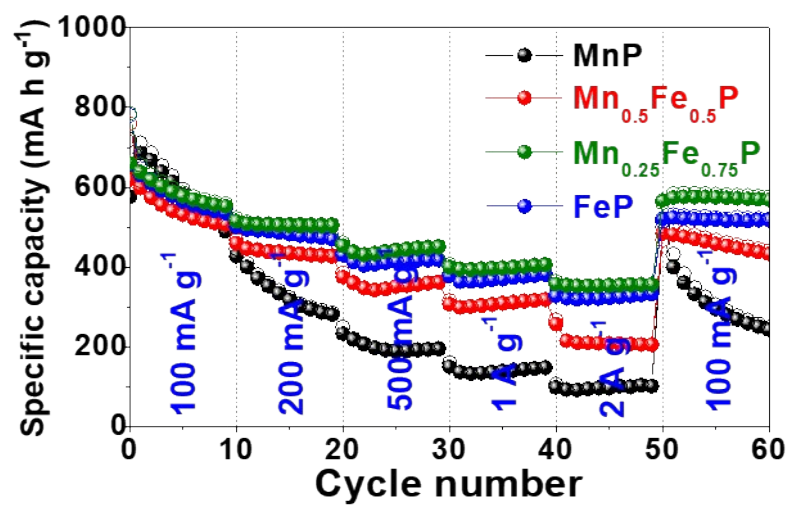

**Fig. S9** (a) Rate capabilities of the  $\text{Mn}_{1-x}\text{Fe}_x\text{P}$  ( $x = 0, 0.5, 0.75$ , and  $1$ ) electrodes.

**Fig. S10** Lithium storage performance comparison of  $\text{Mn}_{0.25}\text{Fe}_{0.75}\text{P}$  solid solution electrode with the previously reported FeP and MnP-based electrodes.

| Materials                                               | Current density<br>( $\text{mA g}^{-1}$ ) | Capacity<br>( $\text{mA h g}^{-1}$ ) | Cycle number<br>(cycle retention) | Ref.      |
|---------------------------------------------------------|-------------------------------------------|--------------------------------------|-----------------------------------|-----------|
| MnP nanorod                                             | 144                                       | 350                                  |                                   | [1]       |
|                                                         | 1440                                      | 200                                  |                                   |           |
|                                                         | 3600                                      | 150                                  |                                   |           |
| MnP powder                                              | 50                                        | 287                                  | 50 (33%)                          | [2]       |
| MnP nanoparticle                                        | 120                                       | 289                                  | 10 (80%)                          | [3]       |
| FeP spheroidal particle                                 | 100                                       | 600                                  |                                   | [4]       |
|                                                         | 1000                                      | 300                                  |                                   |           |
| FeP nanoplate                                           | 200                                       | 350                                  | 100 (60%)                         | [5]       |
| FeP nanosphere                                          | 200                                       | 207                                  | 100 (23%)                         | [6]       |
| $\text{Mn}_{0.25}\text{Fe}_{0.75}\text{P}$ nanoparticle | 100                                       | 506                                  | 40 (76%)                          | This work |
|                                                         | 1000                                      | 464                                  | 60 (97%)                          |           |
|                                                         | 2000                                      | 370                                  | 100 (99%)                         |           |

[1] P. Mei, J. Lee, M. Pramanik, A. Alshehri, J. Kim, J. Henzie, J. Kim, Y. Yamauchi, *ACS Appl. Mater. Inter.* 2018, **10**, 19739-19745.

[2] L. Li, Y. Peng, H. Yang, *Electrochimica Acta.* 2013, **95**, 230-236.

[3] S. Sim, J. Cho, *J. Electrochem. Soc.* 2012, **159**(5), A669-A672.

[4] P. S. Veluri, S. Mitra, *RSC advance*, 2016, **6**, 87675-87679.

[5] F. Han, C. Zhang, J. Yang, G. Ma, K. He, X. Li, *J. Mater. Chem. A.* 2016, **4**, 12781-12789.

[6] X. Wang, K. Chen, G. Wang, X. Liu, H. Wang, *ACS Nano.* 2017, **11**, 11602-11616.

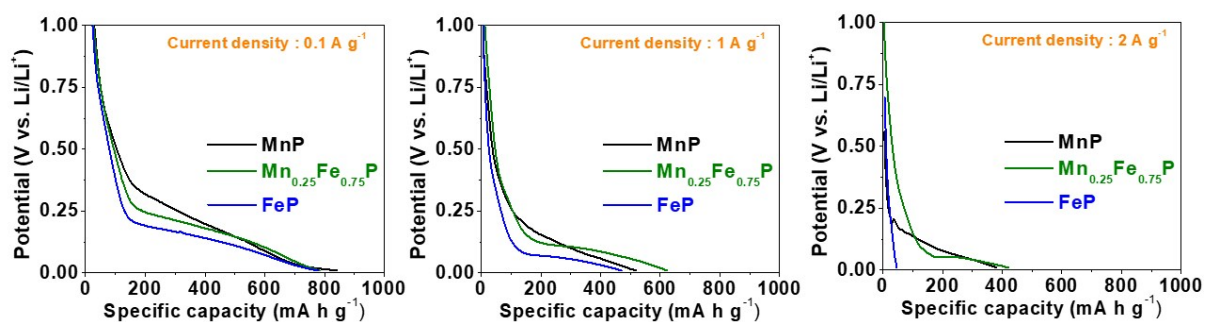

**Fig. S11** Galvanostatic discharge voltage profiles of Mn<sub>1-x</sub>Fe<sub>x</sub>P ( $x = 0, 0.75$ , and 1) electrodes for 1<sup>st</sup> cycle at 0.1, 1.0, and 2.0 A g<sup>-1</sup>, respectively.

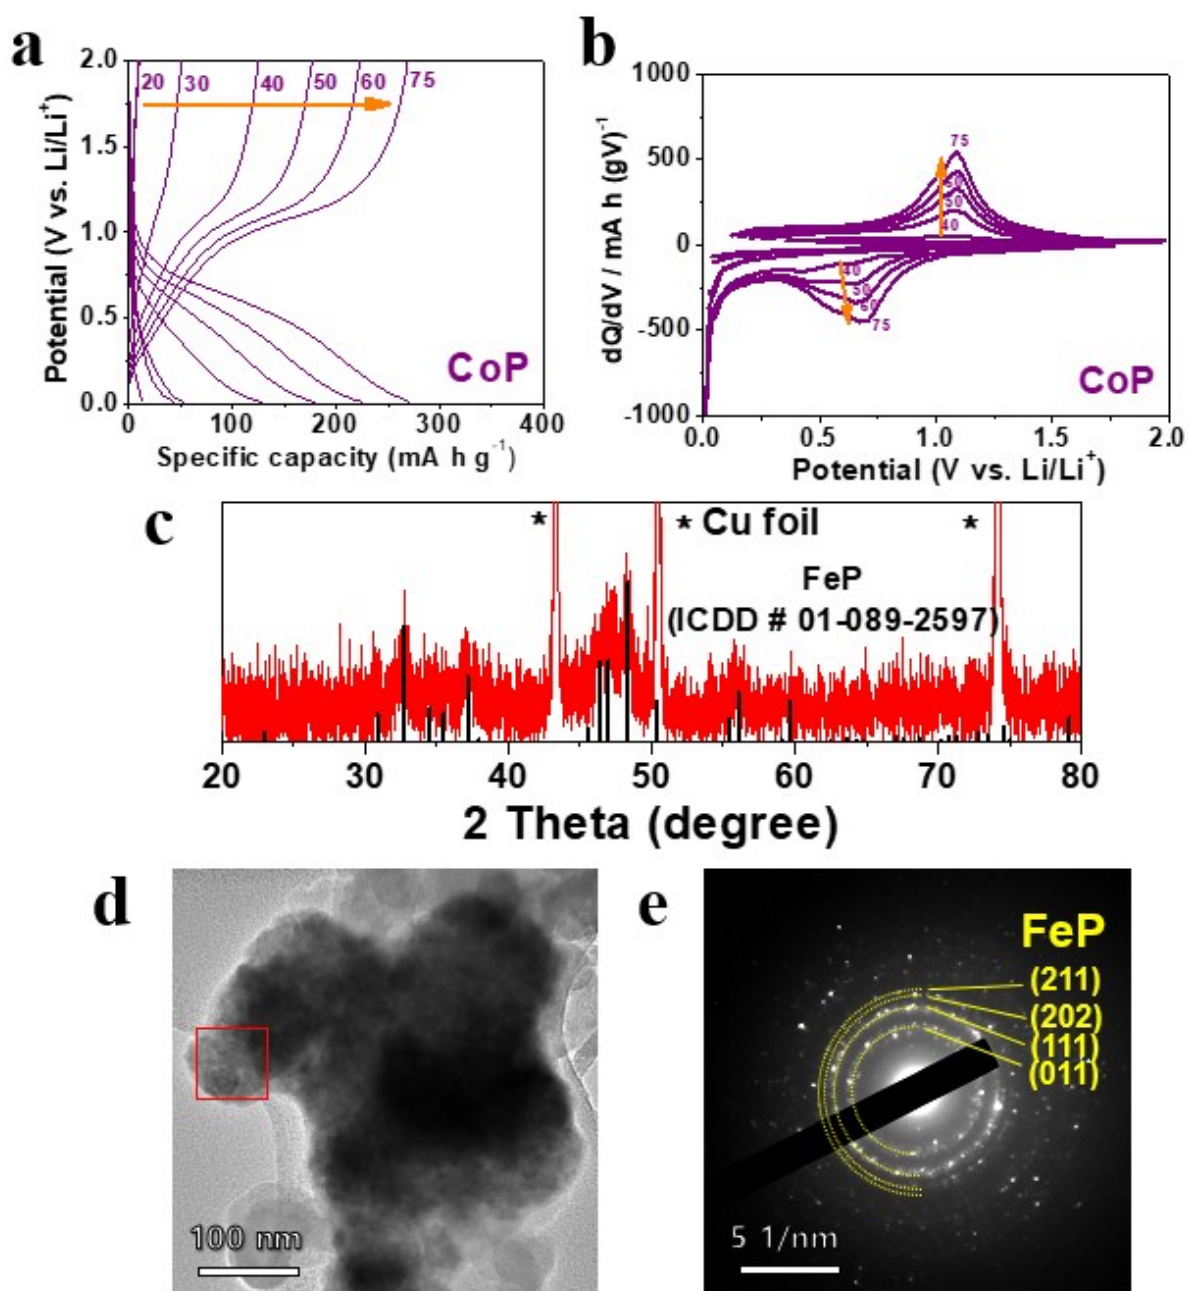

**Fig. S12** (a) Galvanostatic voltage profiles and (b) corresponding differential capacity plots (DCPs) of CoP electrode at  $2 \text{ A g}^{-1}$  and (c) XRD pattern, (d) TEM image, and (e) SAED pattern of FeP electrode for 1<sup>st</sup> fully discharged state at  $2 \text{ A g}^{-1}$ .

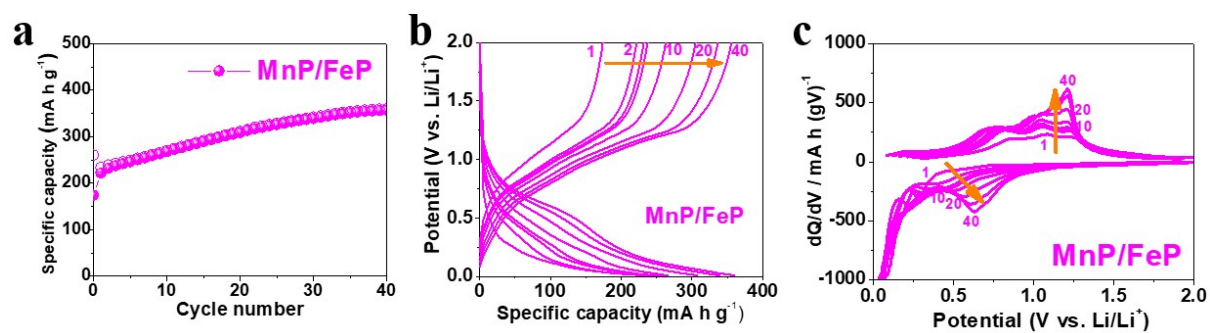

**Fig. S13** (a) Cycling performance of MnP/FeP electrode at  $2 \text{ A g}^{-1}$  and corresponding (b) galvanostatic voltage profiles and (c) differential capacity plots (DCP).

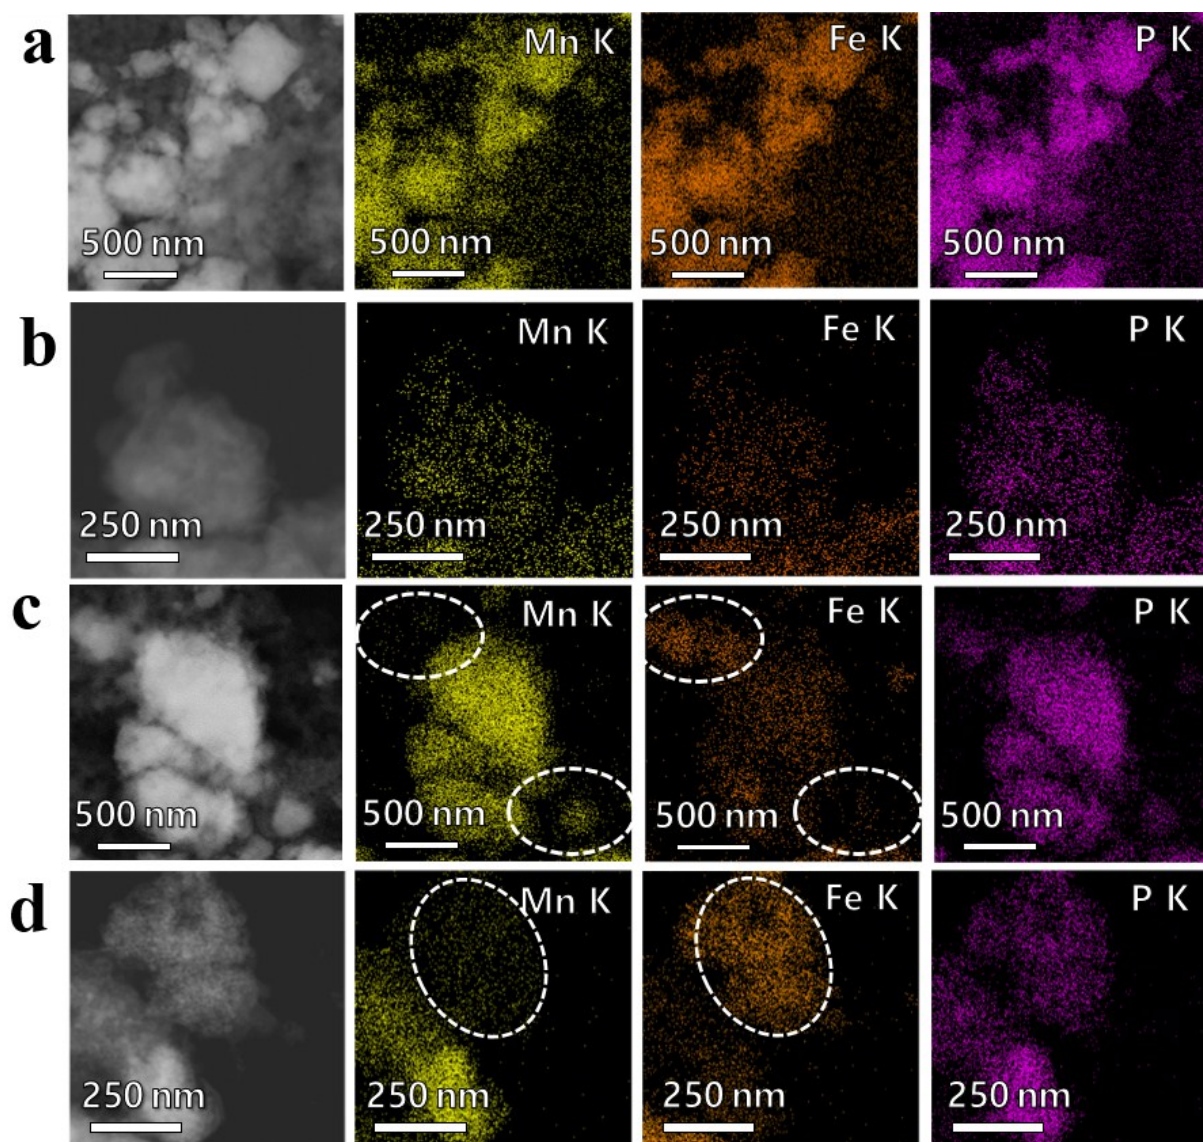

**Fig. S14** STEM images and EDS mapping images (Mn K, Fe K, and P K) of after 1<sup>st</sup> and 100<sup>th</sup> cycled electrodes tested at 2 A g<sup>-1</sup> for (a,b) Mn<sub>0.5</sub>Fe<sub>0.5</sub>P and (c,d) MnP/FeP electrodes.
